# Supplementary material
Source: publisher figshare collection journal article supplement (https://acs.figshare.com/ndownloader/files/8835970)
Supplement: Supplementary file 1 [file 8835970]

## Supporting Information

### **A New Insight of Li-Doped $\text{Cu}_2\text{ZnSn}(\text{S},\text{Se})_4$ Thin Films: Li-Induced Na Diffusion from Soda Lime Glass by a Cation-Exchange Reaction**

Yanchun Yang,<sup>1,2</sup> Lijian Huang<sup>1</sup>, and Daocheng Pan<sup>1\*</sup>

*<sup>1</sup>State Key Laboratory of Rare Earth Resource Utilization, Changchun Institute of Applied Chemistry, Chinese Academy of Sciences, 5625 Renmin Street, Changchun, Jilin, 130022, P. R. China; <sup>2</sup>University of Chinese Academy of Sciences, Beijing, 100049, China*

*Tel: +86-431-85262941; email: pan@ciac.ac.cn*

**Characterizations:**

The thickness of the thin film was measured by a step profiler (AMBIOS, XP-100). The X-ray diffraction (XRD) patterns were taken with a Bruker D8 X-ray diffractometer. The scanning electron microscope (SEM) images were collected using a Hitachi S-4800. The energy dispersive X-ray spectrometry (EDS) was characterized by Bruker AXS XFlash detector 4010 built on the Hitachi S-4800 (20 keV of incident electron beam energy and  $\sim 1.0\ \mu\text{m}$  of the sampled depth). Chemical compositions were determined by inductively coupled plasma-optical emission spectrometry (ICP-OES) (ICP-PLASMA 1000). X-ray photoelectron spectra (XPS) were measured with VGESCALAB (VG Co., U.K.) by using Al K $\alpha$  X-ray source ( $h\nu=1486\ \text{eV}$ ), and the binding energy was calibrated by the C1s (284.6 eV). Photocurrent density-voltage curves were recorded under the standard AM1.5 illumination ( $100\ \text{mW cm}^{-2}$ ) with a Keithley 2400 source meter. *C-V* curves were measured with Agilent E4890A under dark condition. Note that the frequency of 1000 Hz and ac amplitude of 50 mV were applied for *C-V* measurement. The external quantum efficiency (EQE) spectra were measured by a Zolix SCS100 QE system.

**Table S1.** The chemical compositions of the selenized CZTSSe thin films by ICP-MS

measurement. <sup>a</sup>Li/Cu ratio is a target ratio in the precursor solution.

| <b>Li/Cu<sup>a</sup></b> | <b>Zn/Sn</b> | <b>S/(S+Se)</b> | <b>Cu/(Zn+Sn)</b> |
|--------------------------|--------------|-----------------|-------------------|
| 0                        | 1.27         | 0.080           | 0.684             |
| 0.05                     | 1.24         | 0.086           | 0.713             |
| 0.10                     | 1.24         | 0.085           | 0.701             |
| 0.12                     | 1.29         | 0.075           | 0.67              |
| 0.24                     | 1.24         | 0.080           | 0.687             |
| 0.36                     | 1.25         | 0.081           | 0.67              |
| 0.48                     | 1.25         | 0.083           | 0.678             |

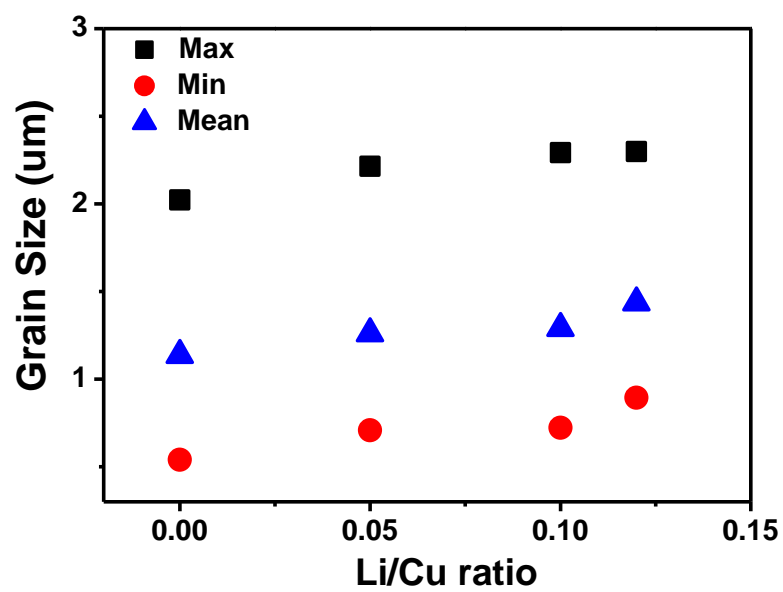

**Figure S1.** The grain sizes of Li-doped CZTSSe thin films with the different Li/Cu ratios in the precursor solutions.

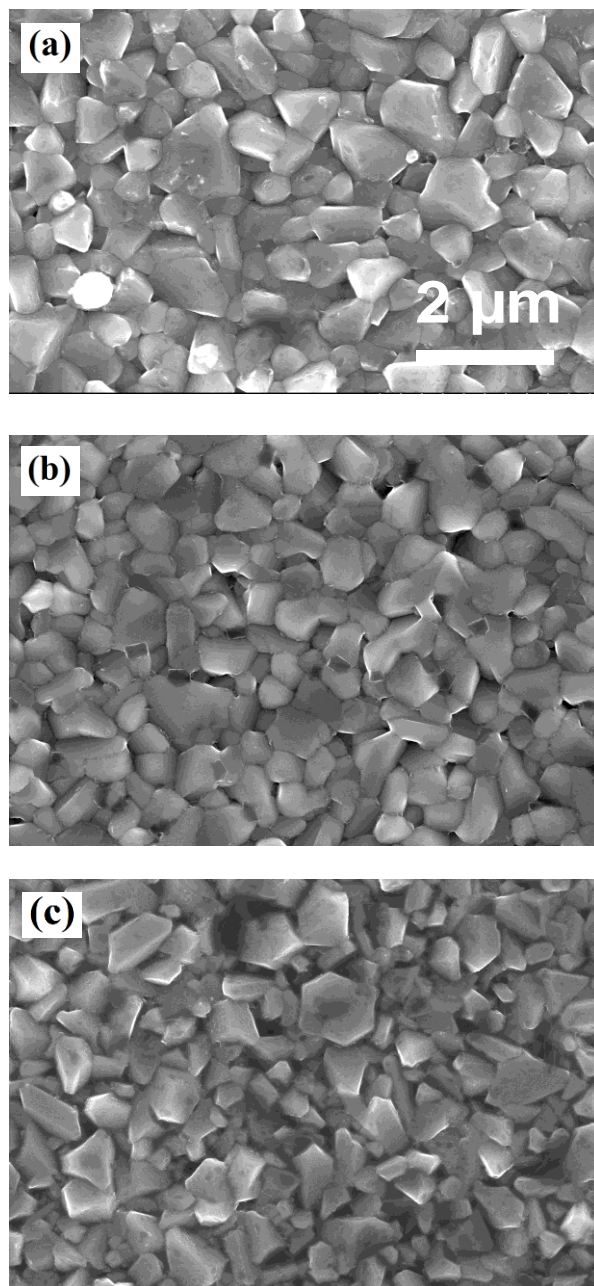

**Figure S2.** Top-view SEM images of Li-doped CZTSSe thin films deposited on the SLG substrate with different molar ratios of Li/Cu in the precursor solutions. (a) 0.24; (b) 0.36; (c) 0.48.

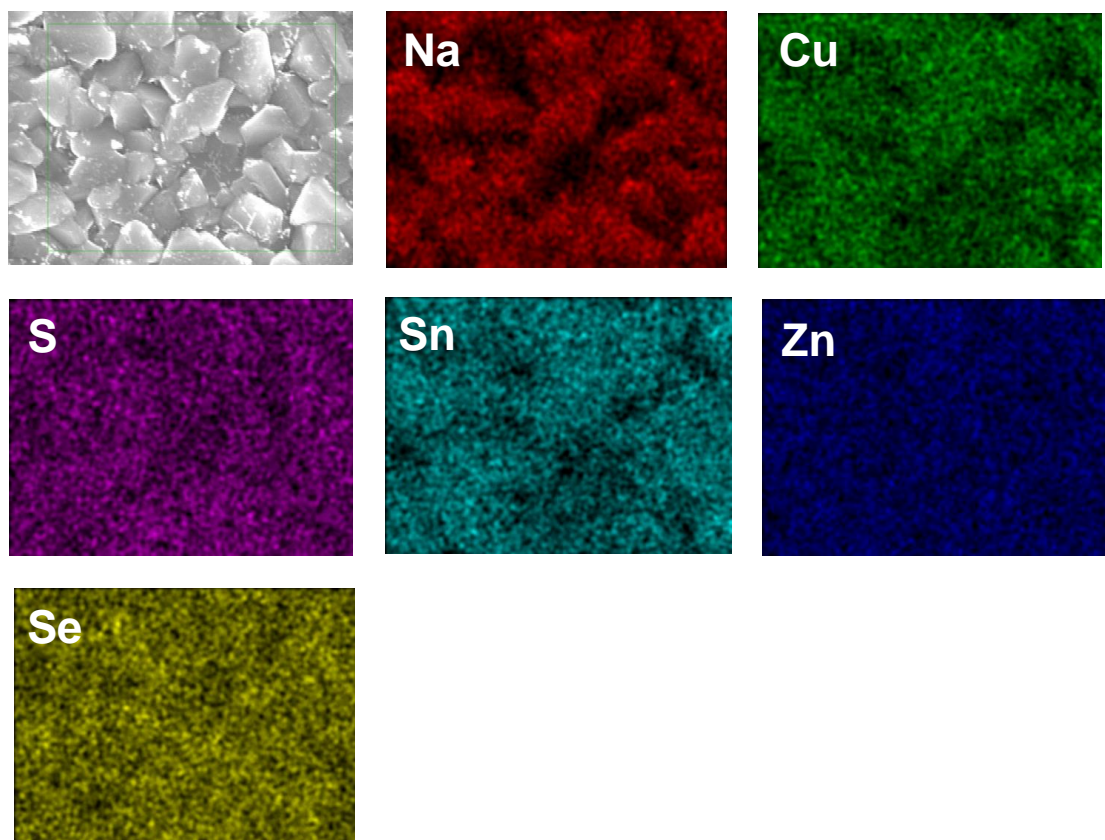

**Figure S3.** EDS elemental mapping images of the selenized CZTSSe thin film with a Li/Cu ratio of 0.24 in the precursor solution.

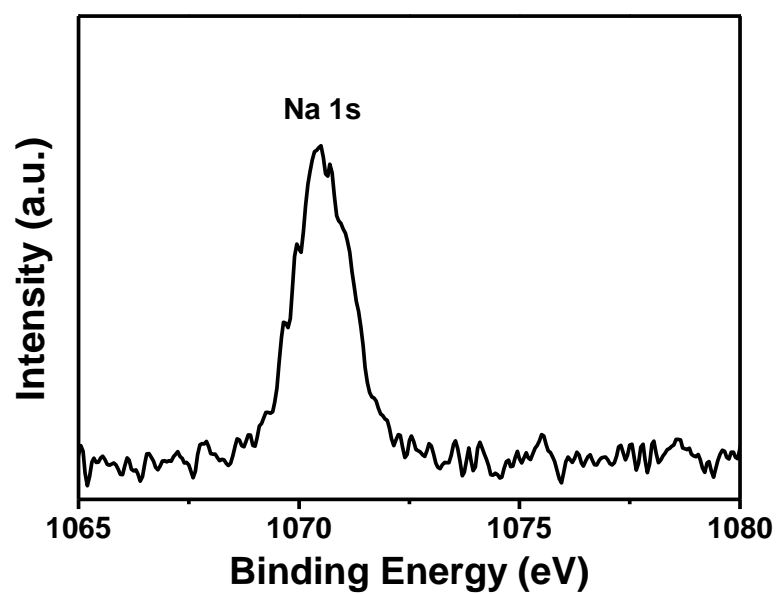

**Figure S4.** XPS spectrum of Na on the surface of the Li-doped CZTSSe thin film.

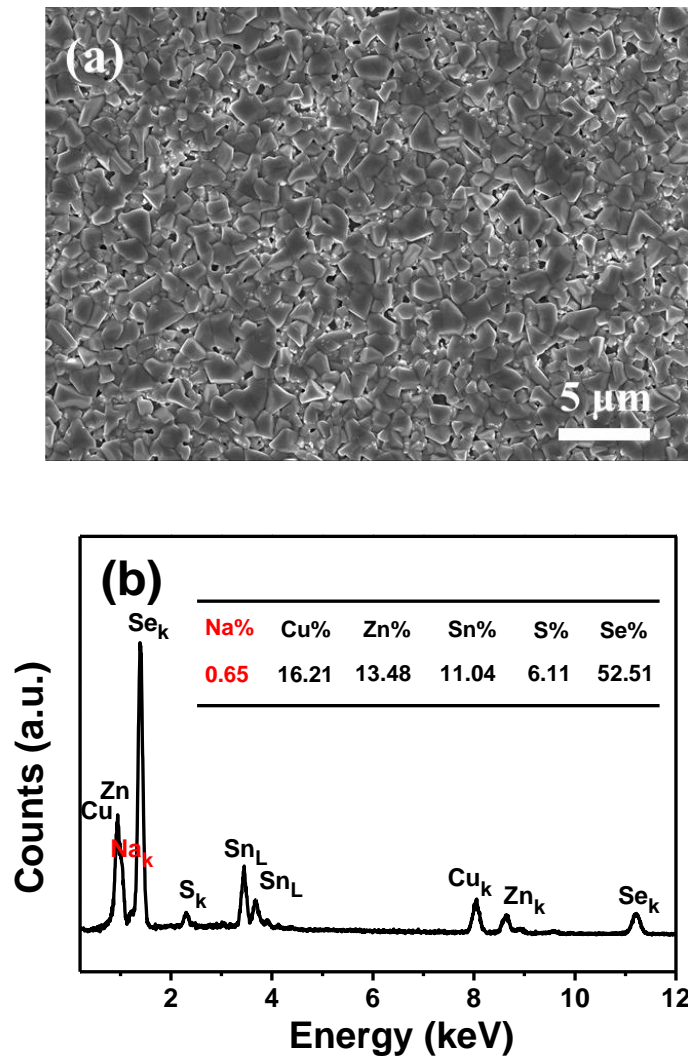

**Figure S5.** The top-view SEM image (a) and EDS spectrum (b) of the selenized Li-doped CZTSSe thin film after washing.



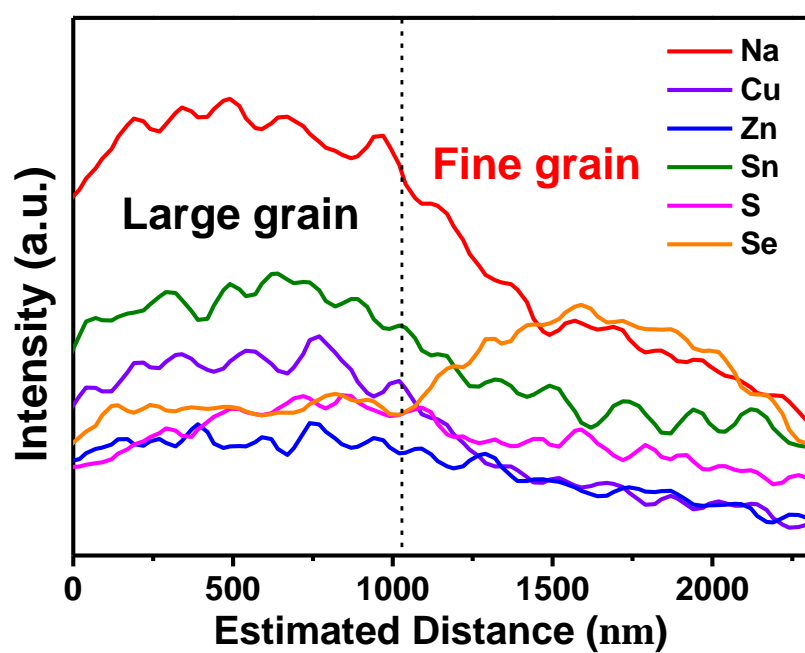

**Figure S6.** EDS scan lines of the selenized CZTSSe thin film with a Li/Cu ratio of 0.24 in the precursor solution.

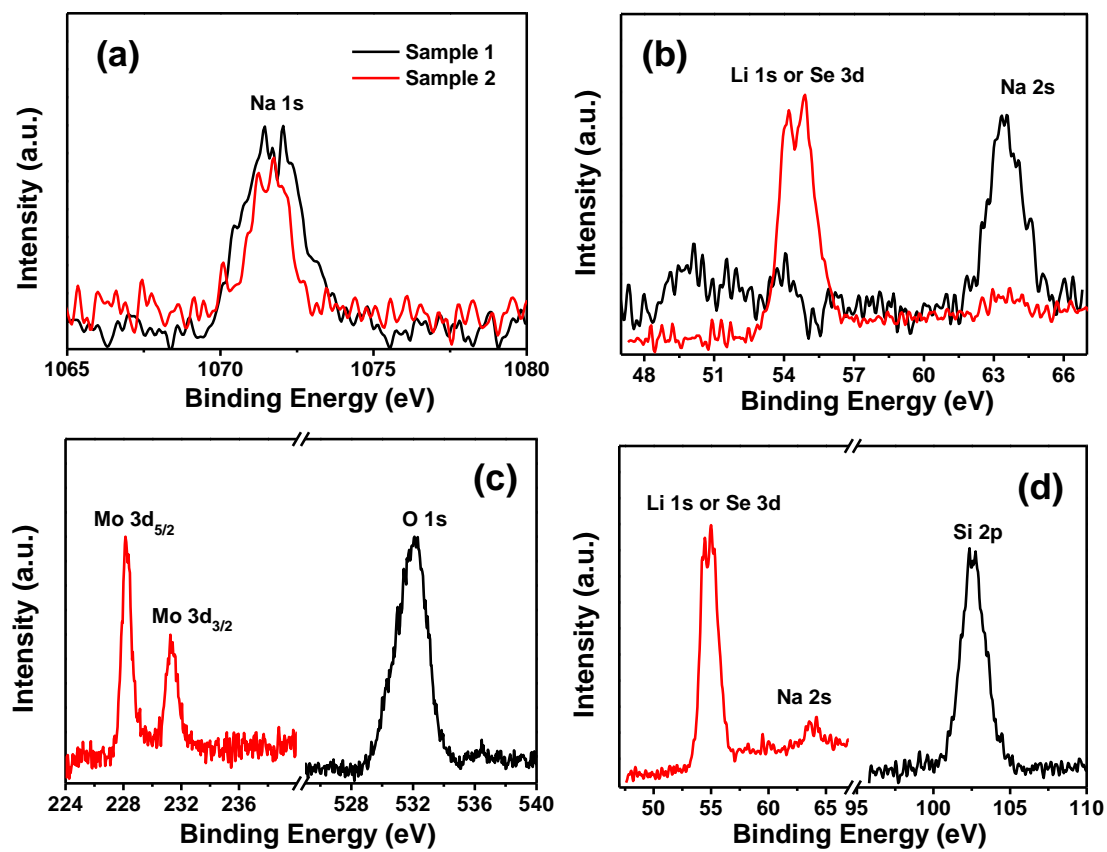

**Figure S7.** XPS spectra of SLG (sample 1) and Mo/SLG (sample 2) layers after peeling off Mo electrode and Li-doped CZTSSe thin film. (a) Na 1s; (b) Li 1s and Se 3d; (c) Mo 3d and O1s; (d) Li 1s, Se 3d and Si 2p.

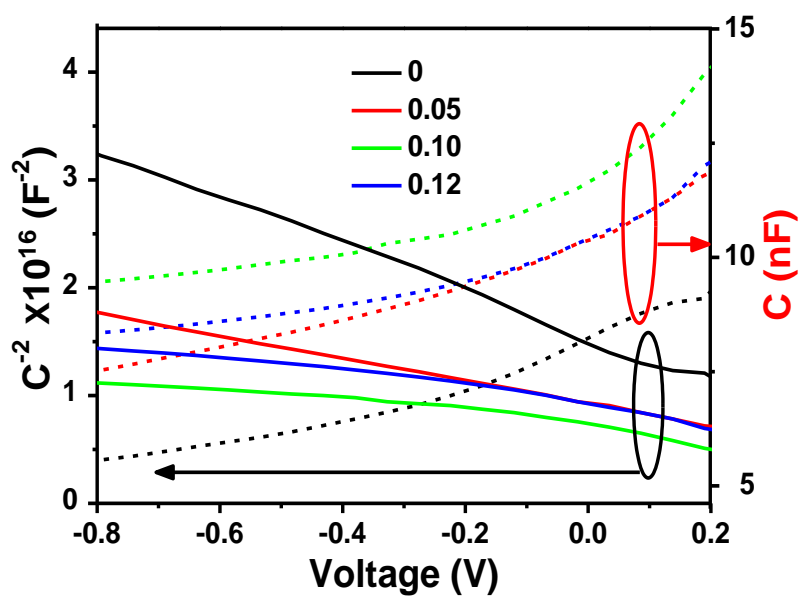

**Figure S8.**  $C-V$  and  $C^{-2}-V$  curves of the selenized CZTSSe solar cells with the different Li/Cu ratios in the precursor solutions.
